# Supplementary material
Source: publisher site journal article supplement (https://www.spandidos-publications.com/2923/downloadSupplementary)

Figure S1. Transfection efficiency of miR-25-3p mimic. (A) SUM-159-PT and (B) MCF-7 cells. \*\*\*P<0.001 vs. mimic NC, miR, microRNA; NC, negative control.

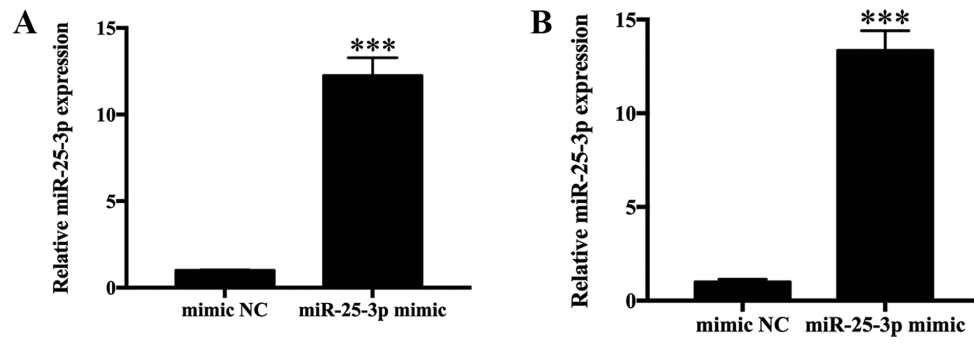

Figure S2. TOB1 expression in breast cancer. (A) TOB1 expression levels in breast cancer and normal tissues. (B) The correlation between TOB1 and miR-25-3p expression. TOB1, transducer of ERBB2, 1; miR, microRNA; BRCA, breast cancer susceptibility gene; TCGA, The Cancer Genome Atlas.

**A**

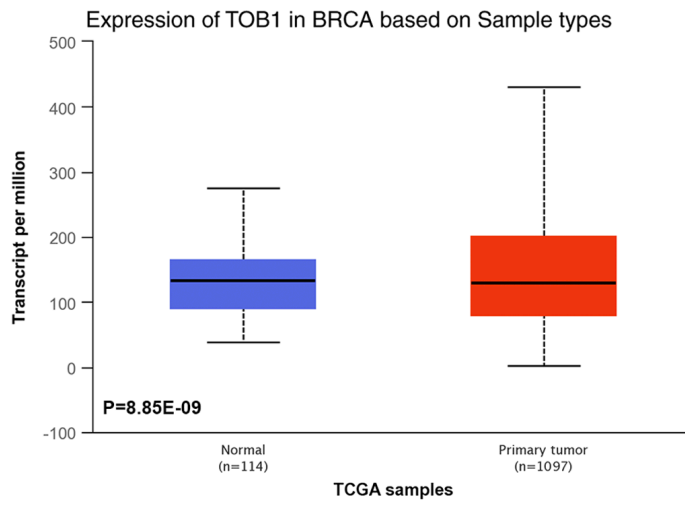

**B**

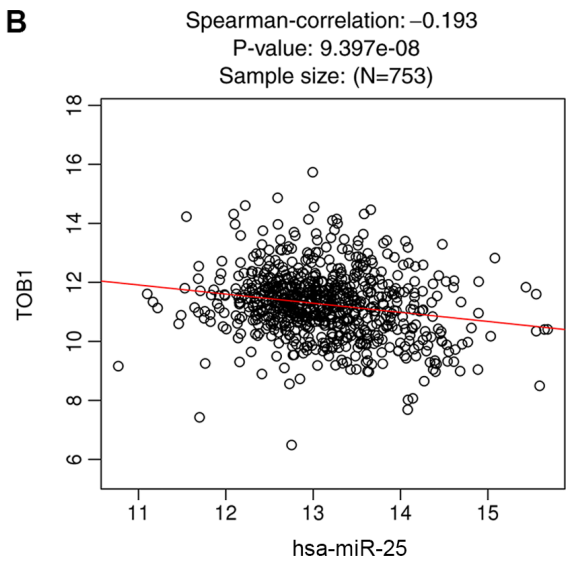

Supplement: Supplementary file 1 [file downloadSupplementary]
